# Supplementary material
Source: Royal Society of Chemistry journal article supplement (doi:10.1039/d6ta02500e)
Supplement: d6ta02500e1.pdf [file d6ta02500e1.pdf]

## Supplementary Information

# Zn-anode interphase regulation by electrolyte additives in aqueous two-electron Zn–I<sub>2</sub> batteries

Hyeonbin Kim<sup>‡</sup>, Jin Kyu Byun<sup>‡</sup>, Duk Hyung Jo, Eun Ji Joo, Hyunseo Kim, Beom Tak Na,  
and Kyu Tae Lee\*

<sup>a</sup>School of Chemical and Biological Engineering, Institute of Chemical Processes, Seoul  
National University, 1 Gwanak-ro, Gwanak-gu, Seoul, Republic of Korea

<sup>‡</sup> Hyeonbin Kim and Jin Kyu Byun contributed equally to this work.

\*Corresponding author: [ktlee@snu.ac.kr](mailto:ktlee@snu.ac.kr)

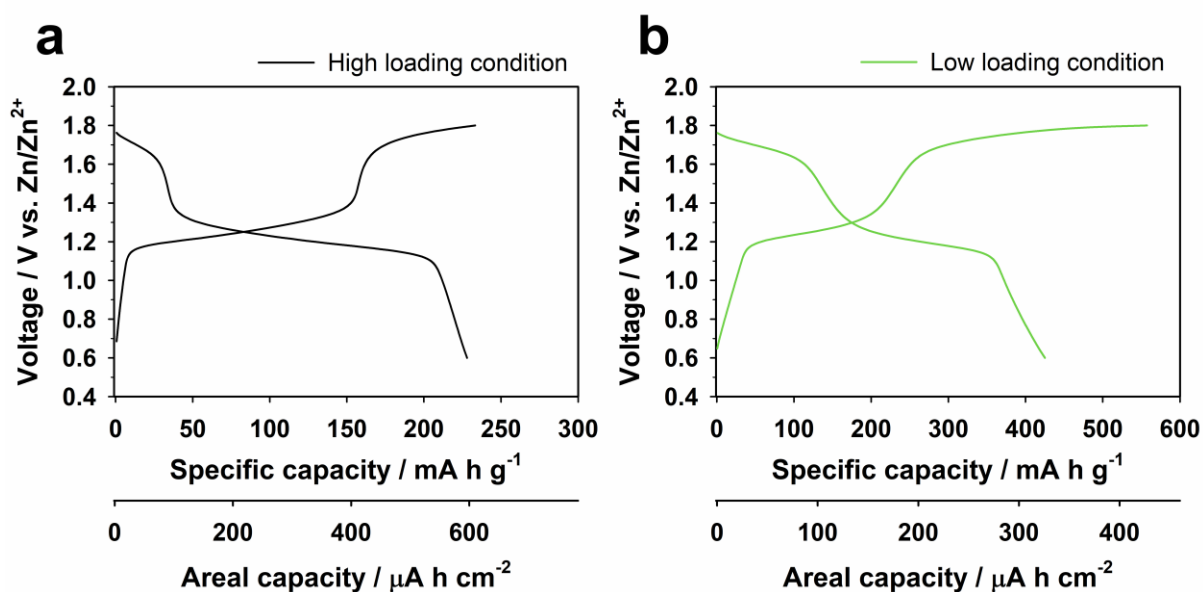

**Fig. S1** Voltage profiles (2<sup>nd</sup> cycle) of aqueous Zn-I<sub>2</sub> full cells in the 1 *m* ZnCl<sub>2</sub> electrolyte with (a) high iodine loading condition (30 wt.%) and (b) low iodine loading condition (15 wt.%). The low-loading cathode delivers a higher gravimetric capacity owing to improved iodine utilization, whereas the high-loading cathode provides a higher areal capacity despite lower gravimetric utilization.

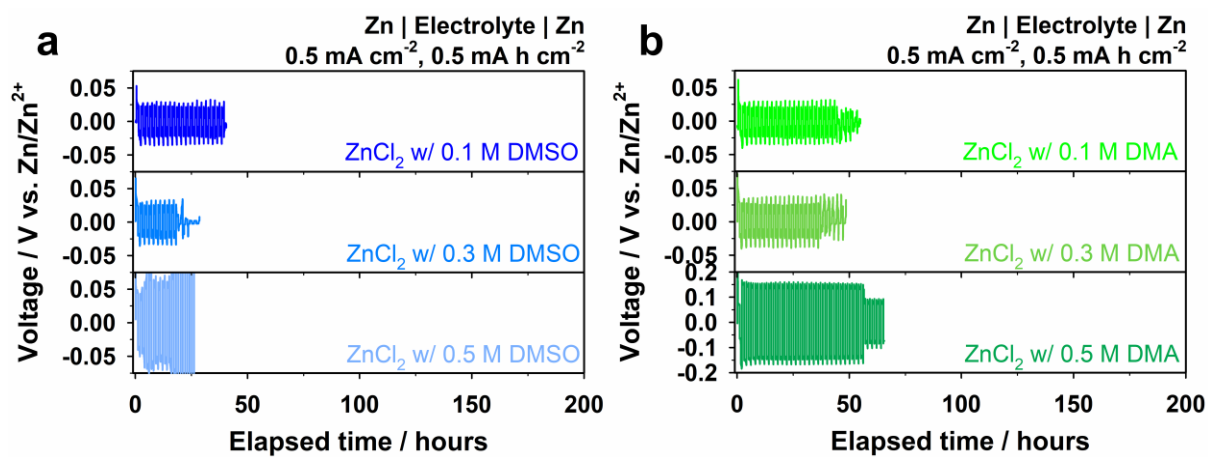

**Fig. S2** Cycle performance of Zn | Zn symmetric cells in 1 *m* ZnCl<sub>2</sub> with varying (a) DMSO and (b) DMA concentrations at a current density of 0.5 mA cm<sup>-2</sup> with an areal capacity of 0.5 mA h cm<sup>-2</sup> per half-cycle.
